# Supplementary material for: Combination of medical and surgical management in successful treatment of caesarean scar pregnancy: a case report series
Source: Springer Nature journal article supplement (doi:10.1186/s12884-020-03237-8), 2020-10-13

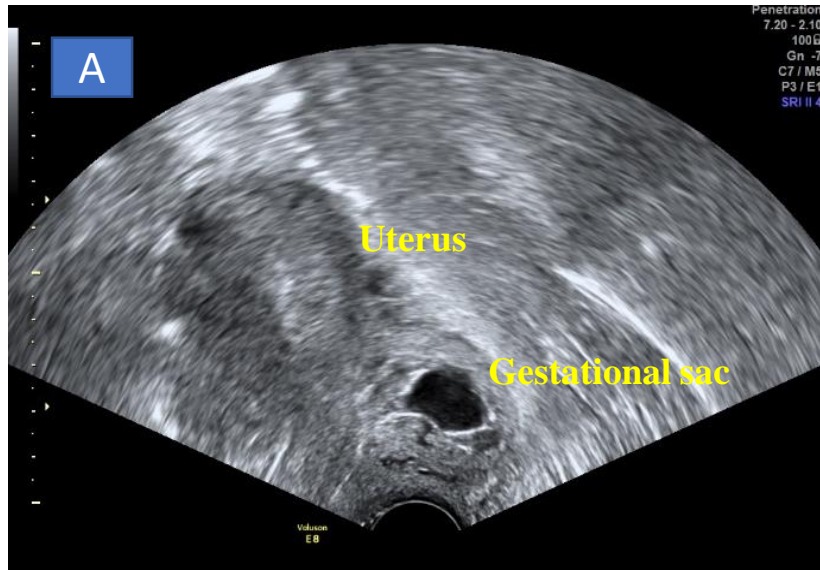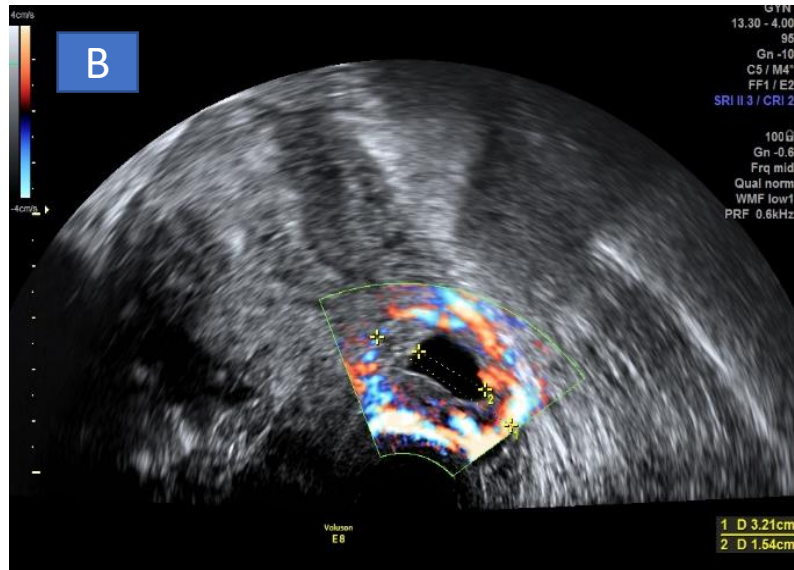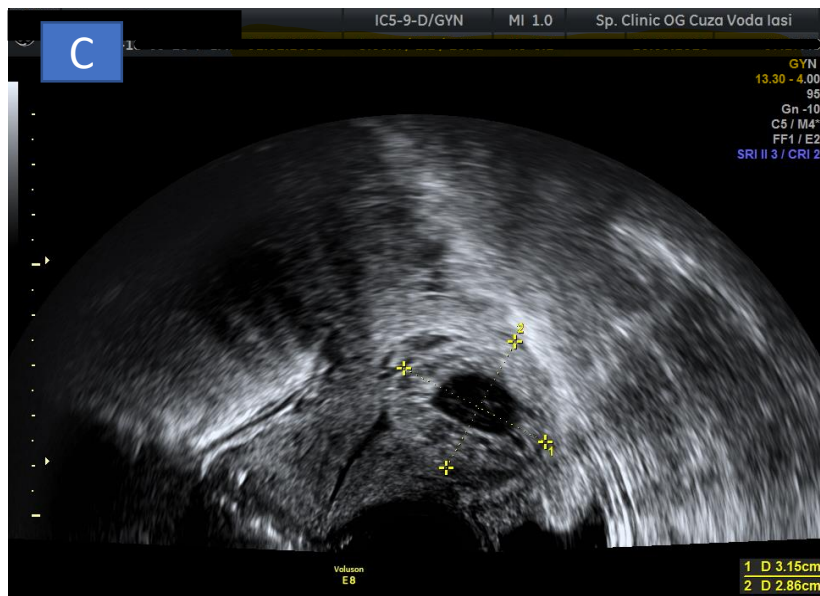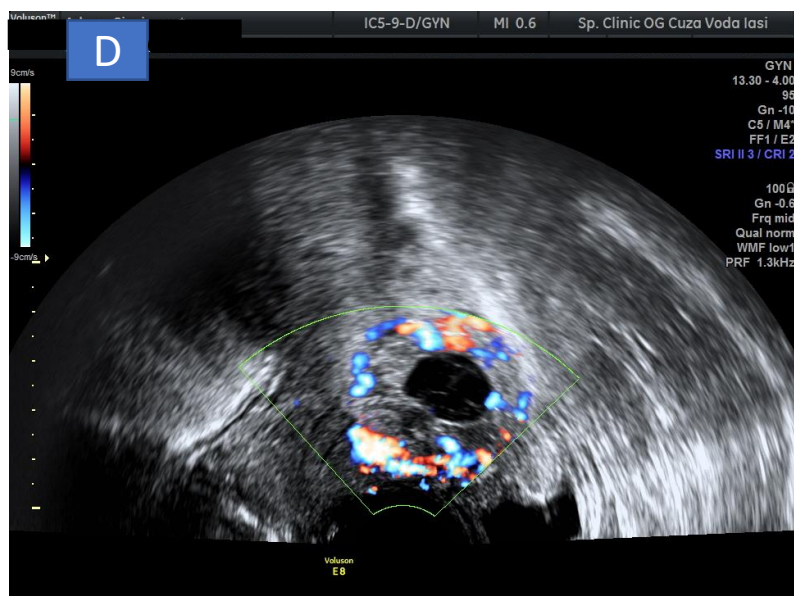

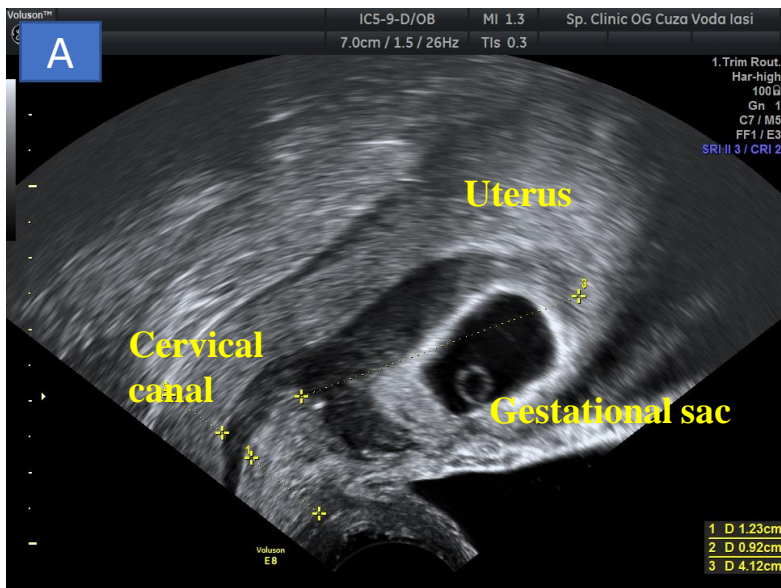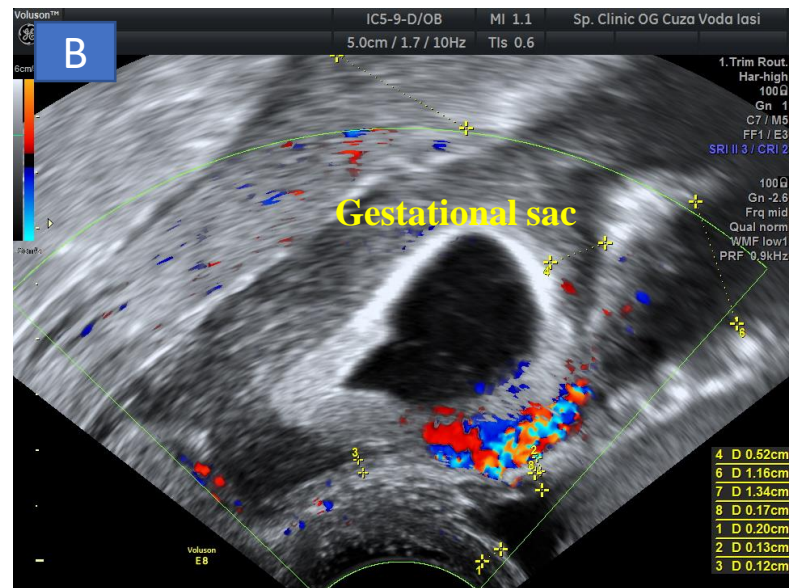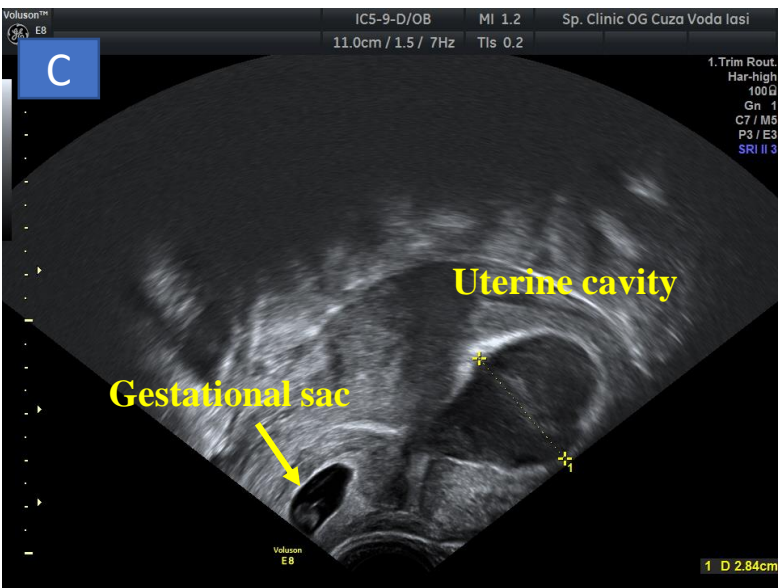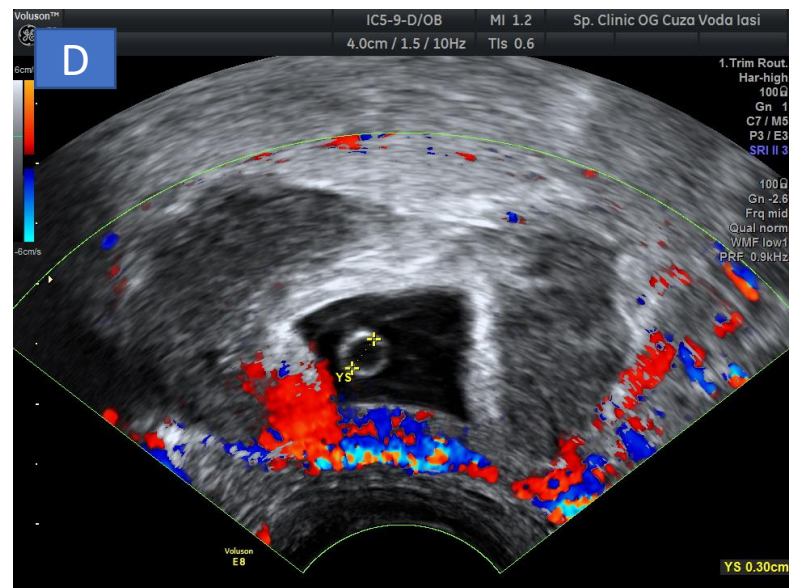

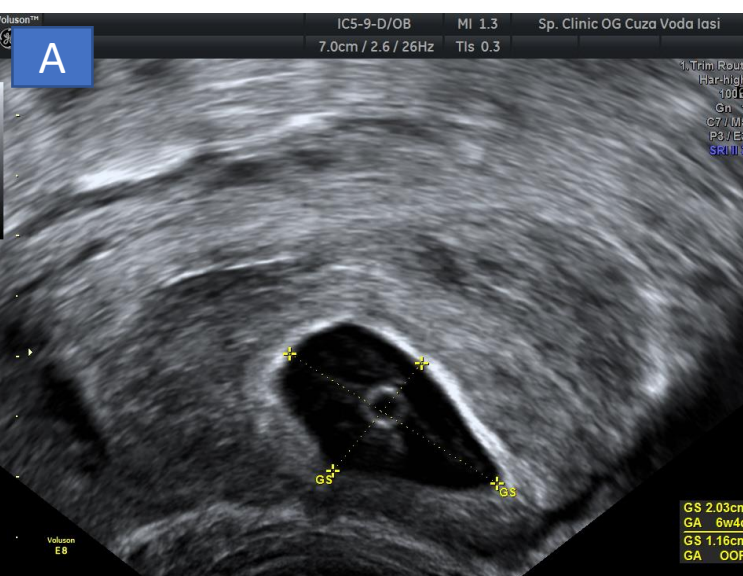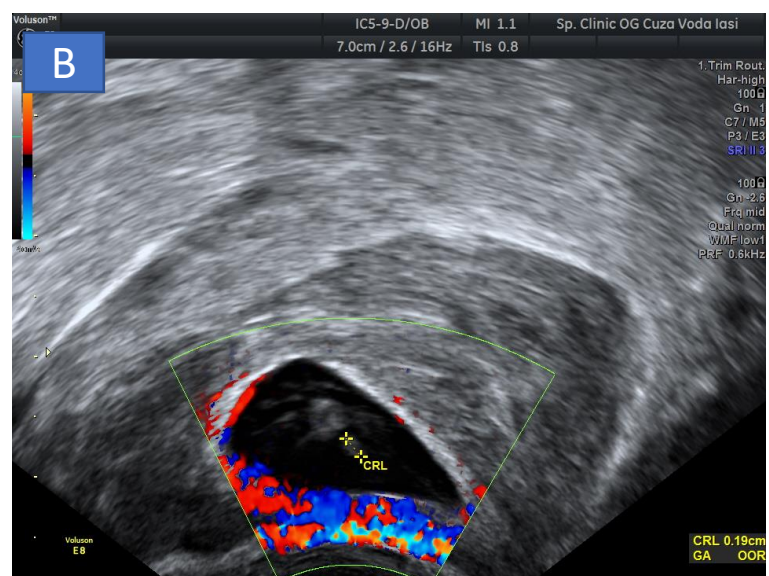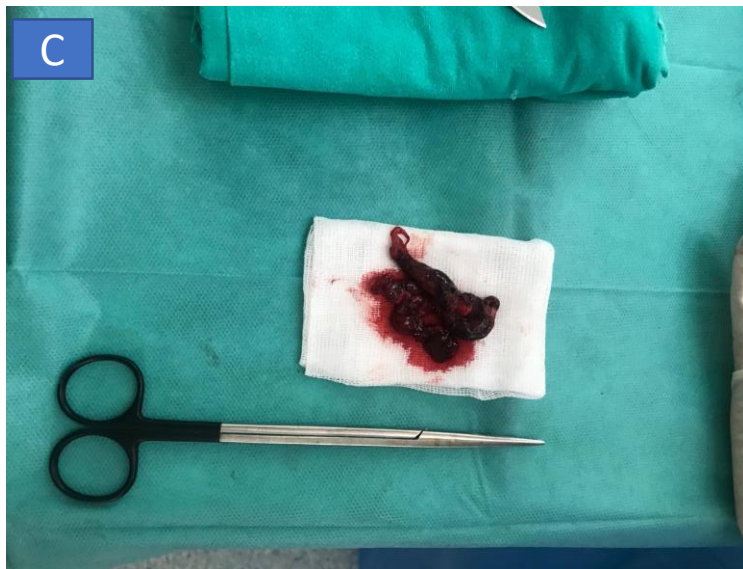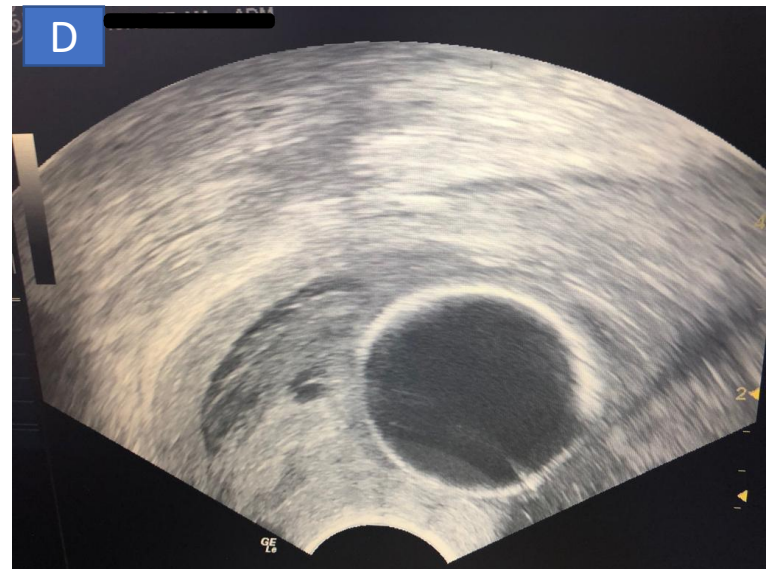

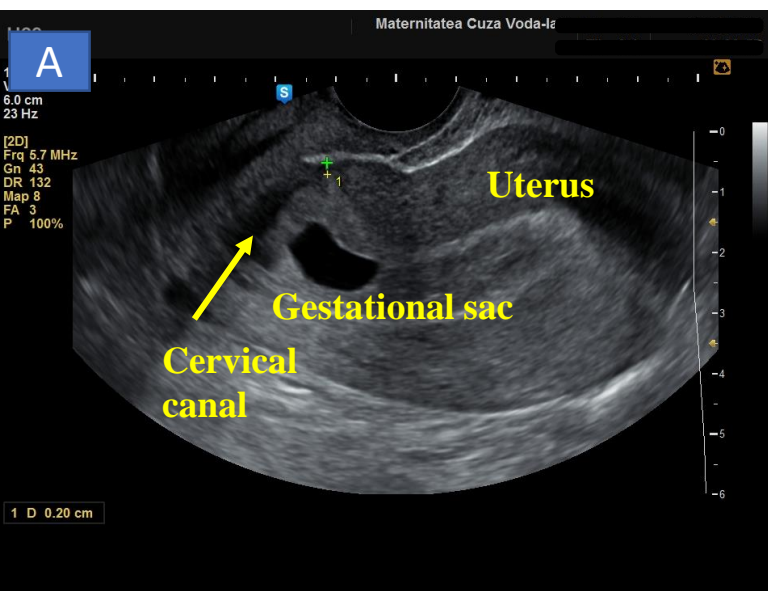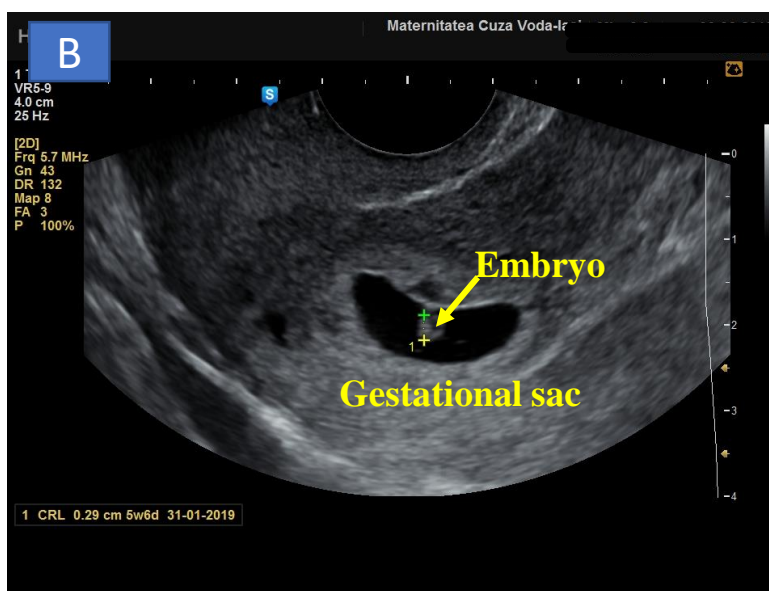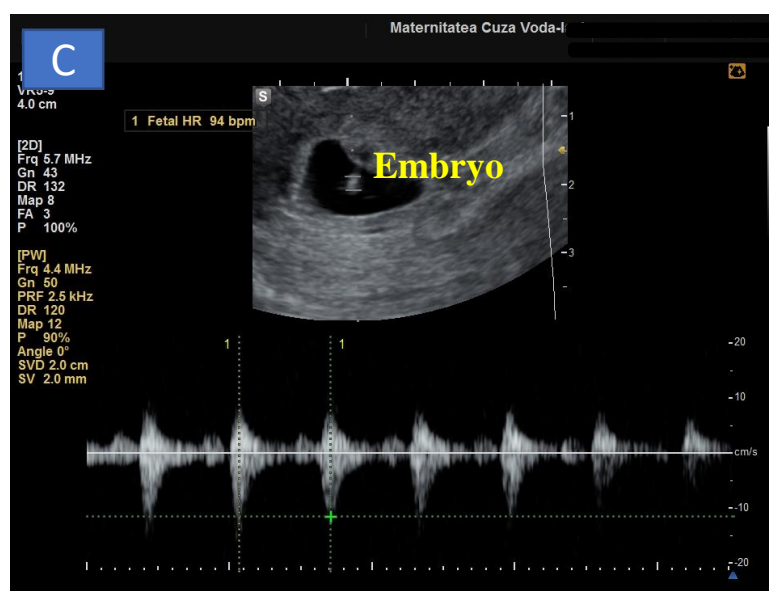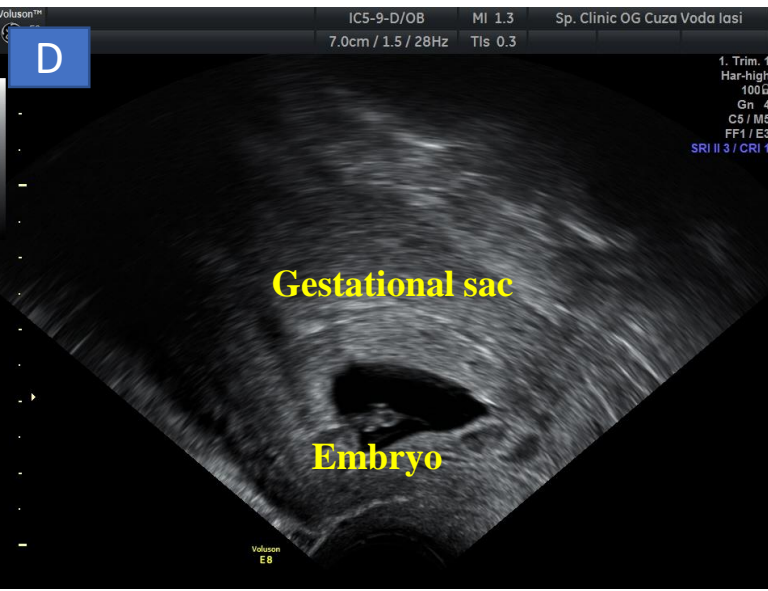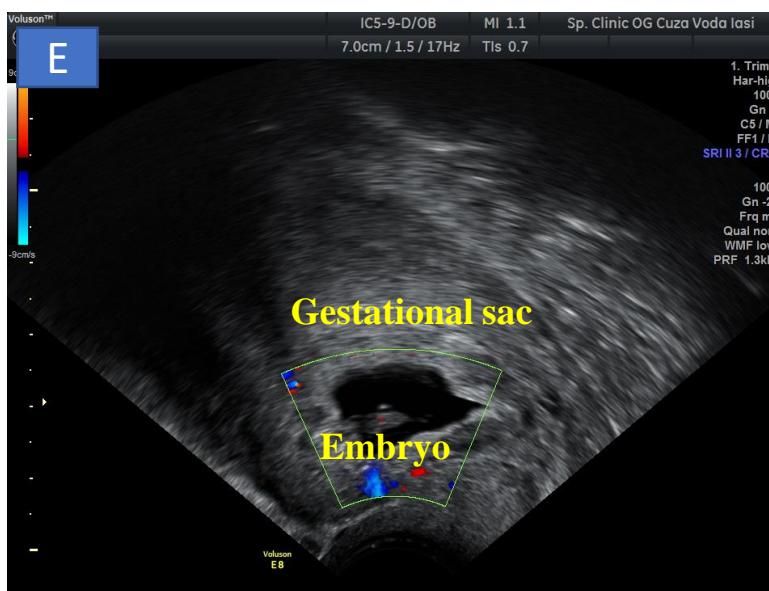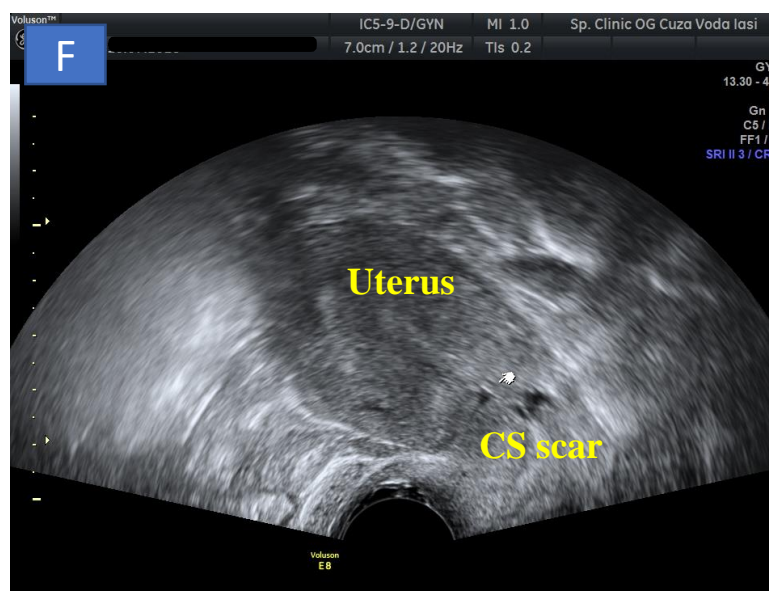

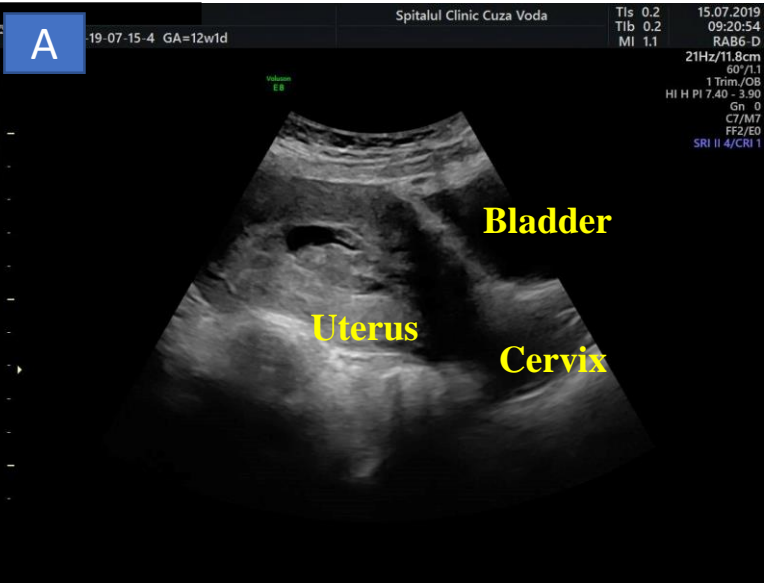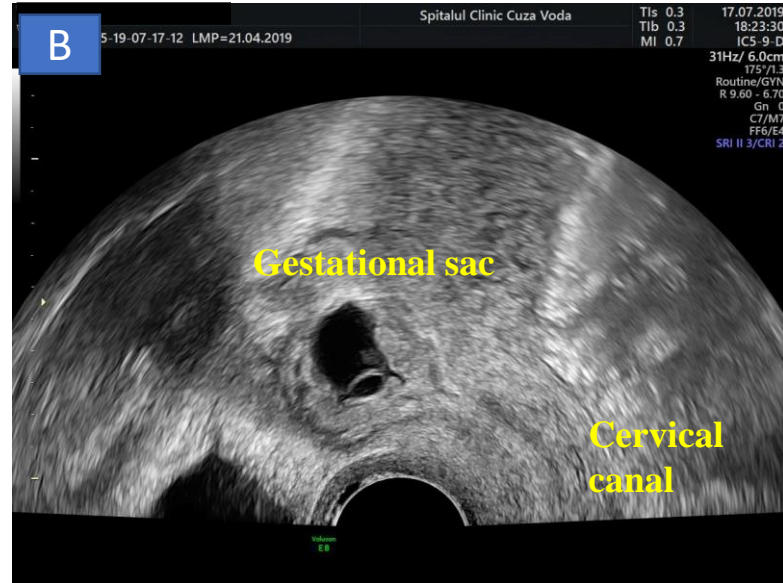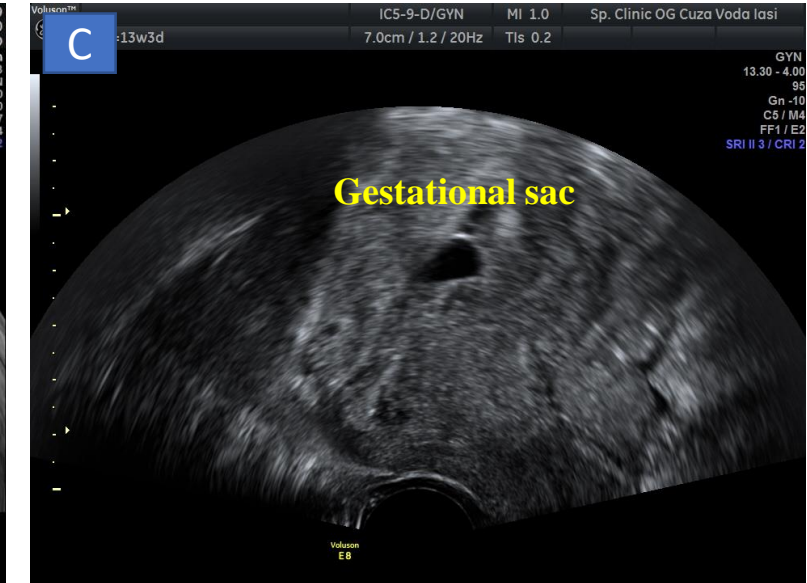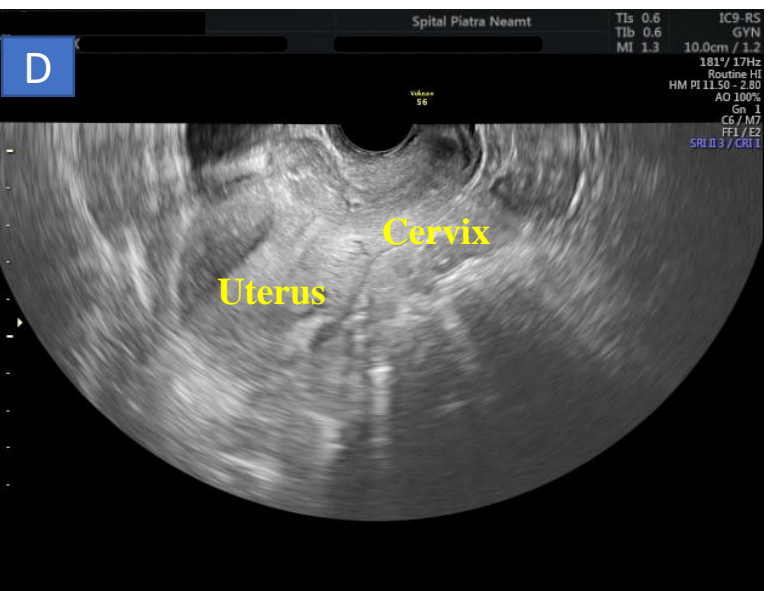

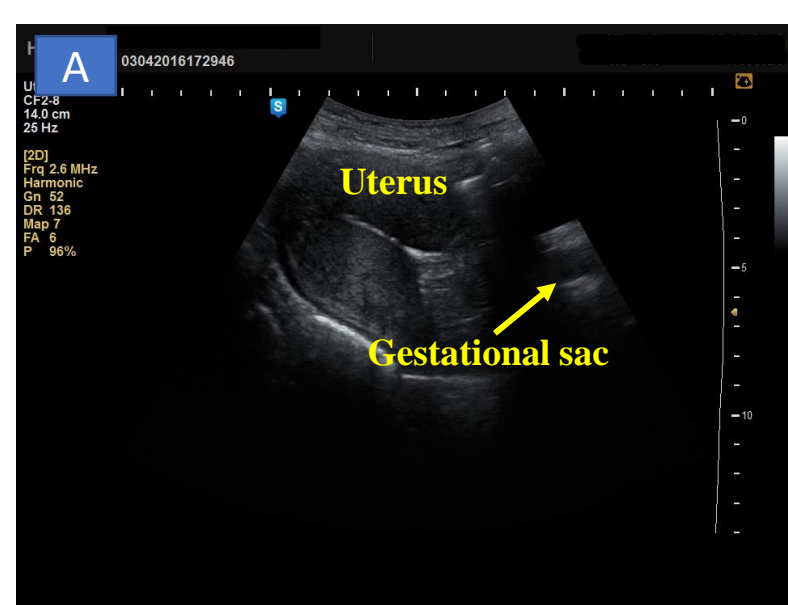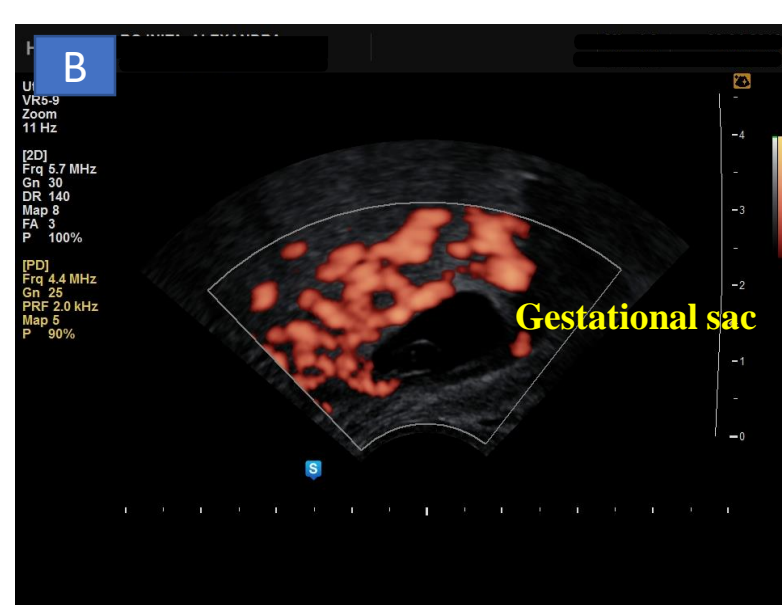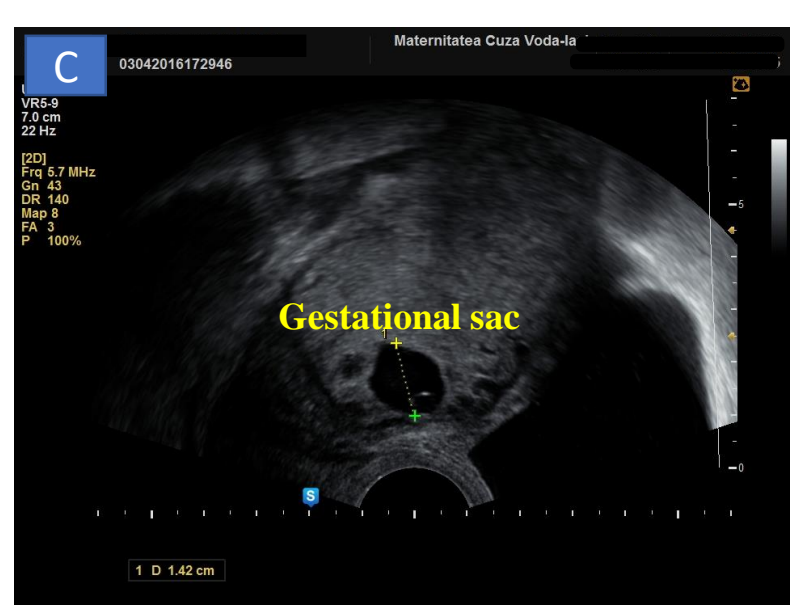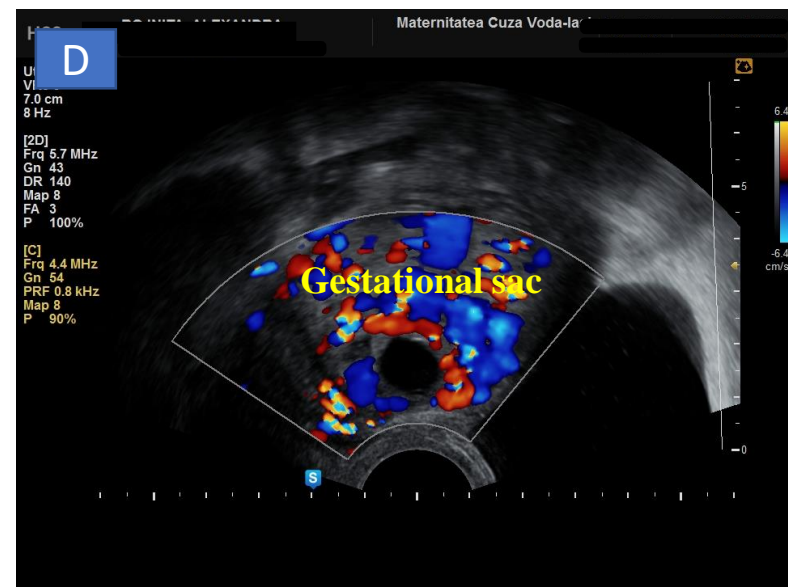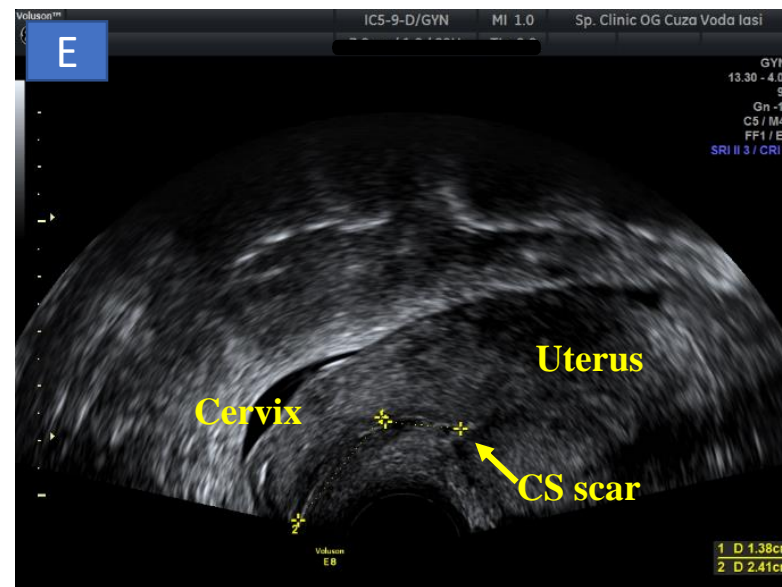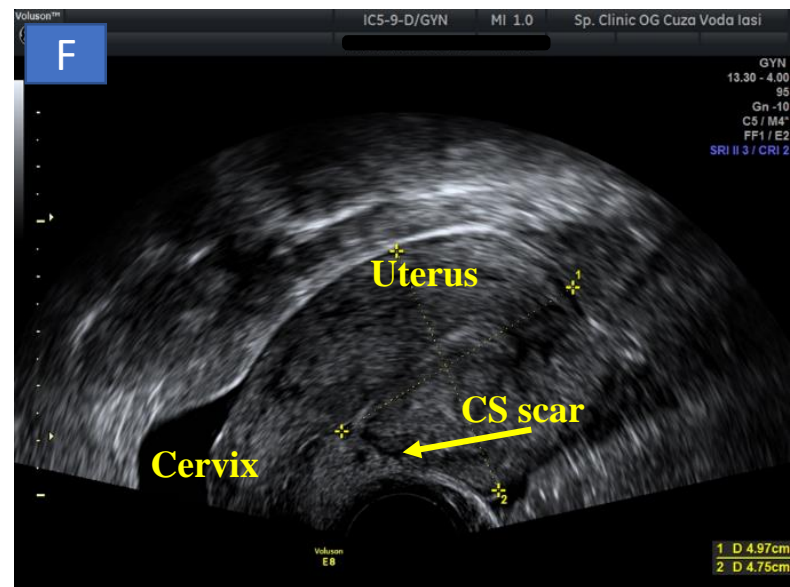

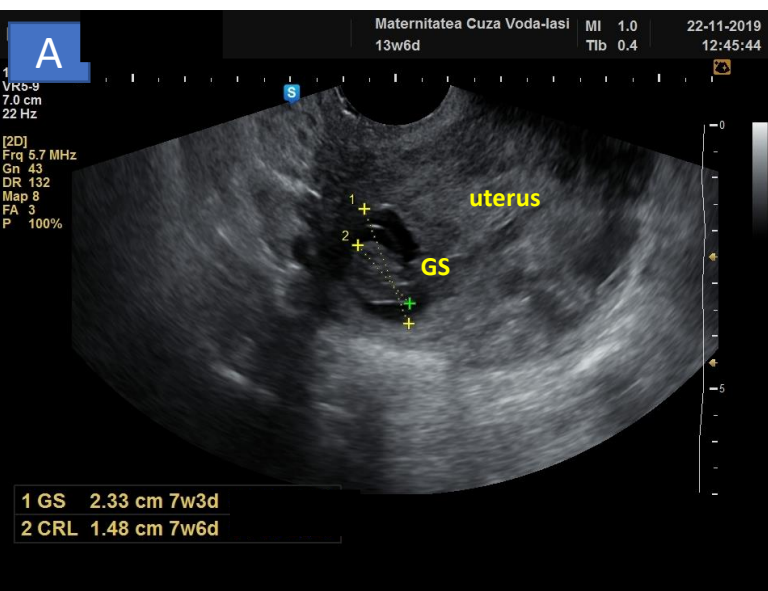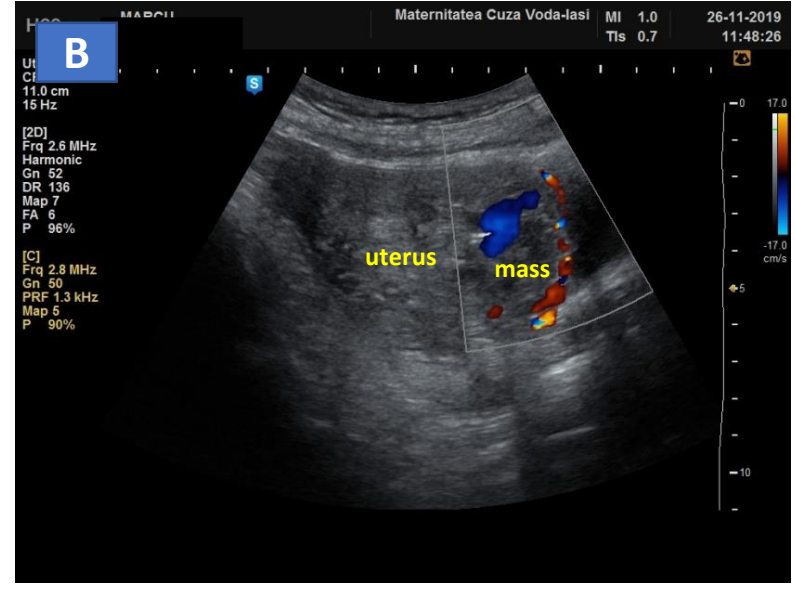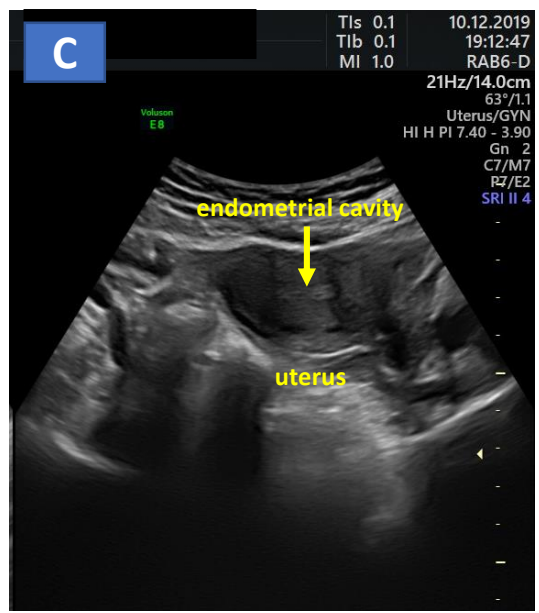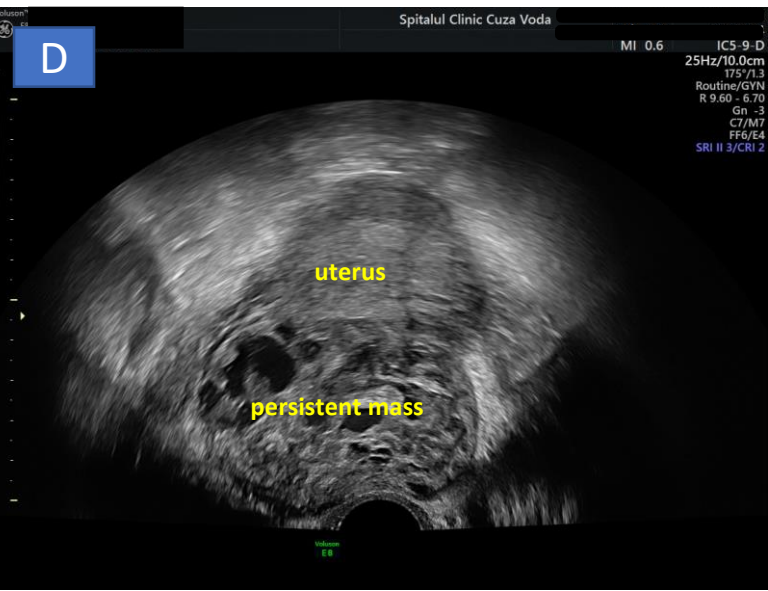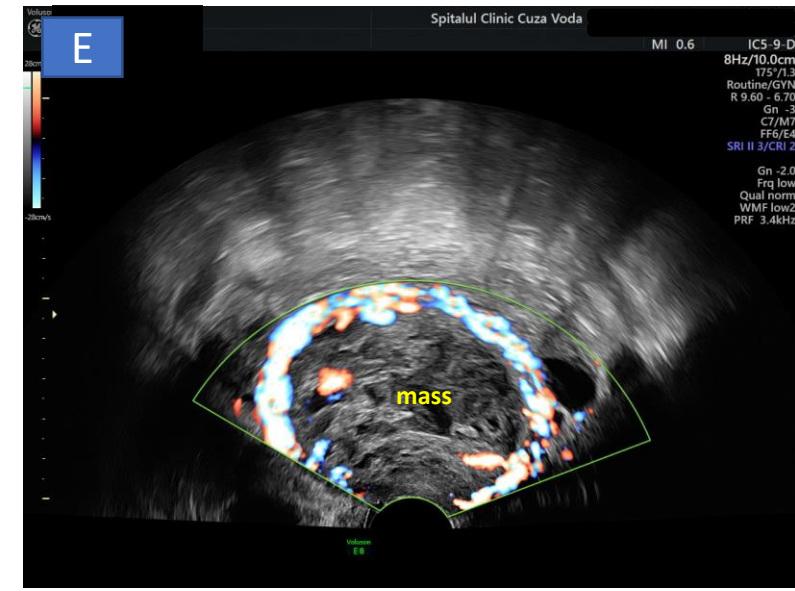

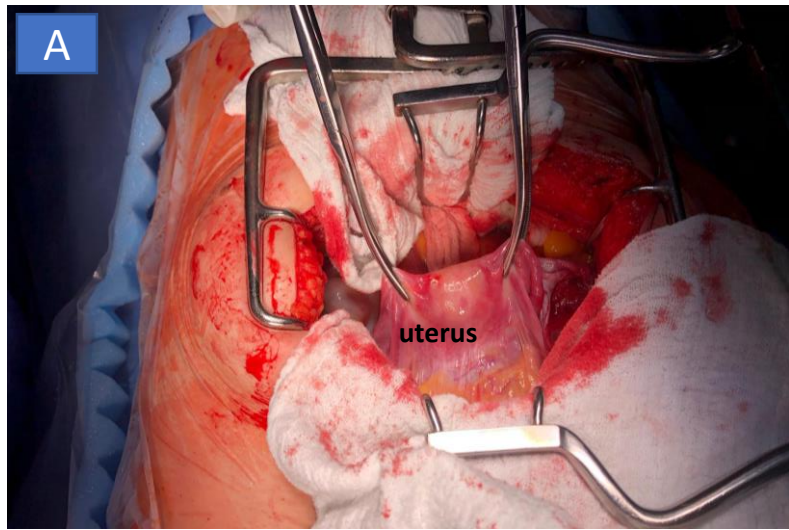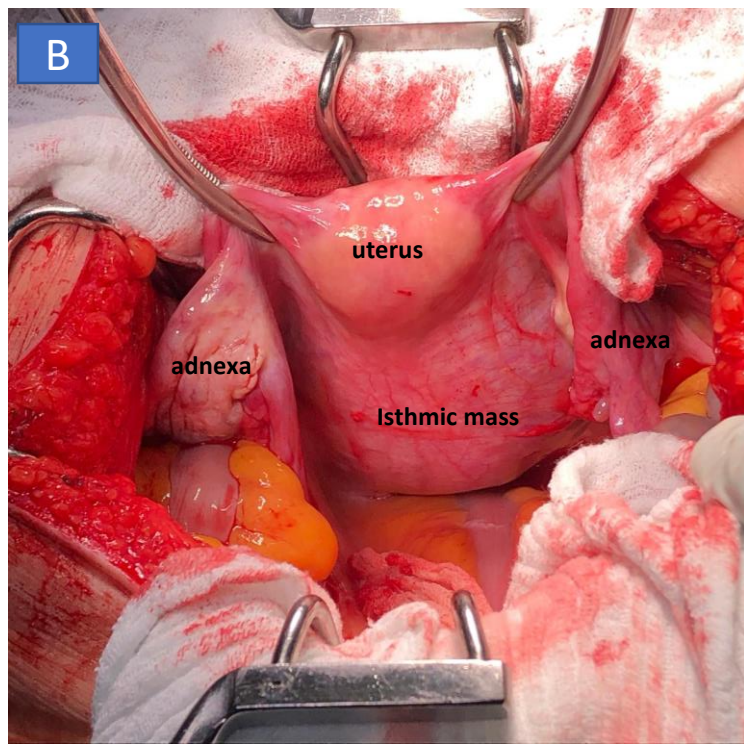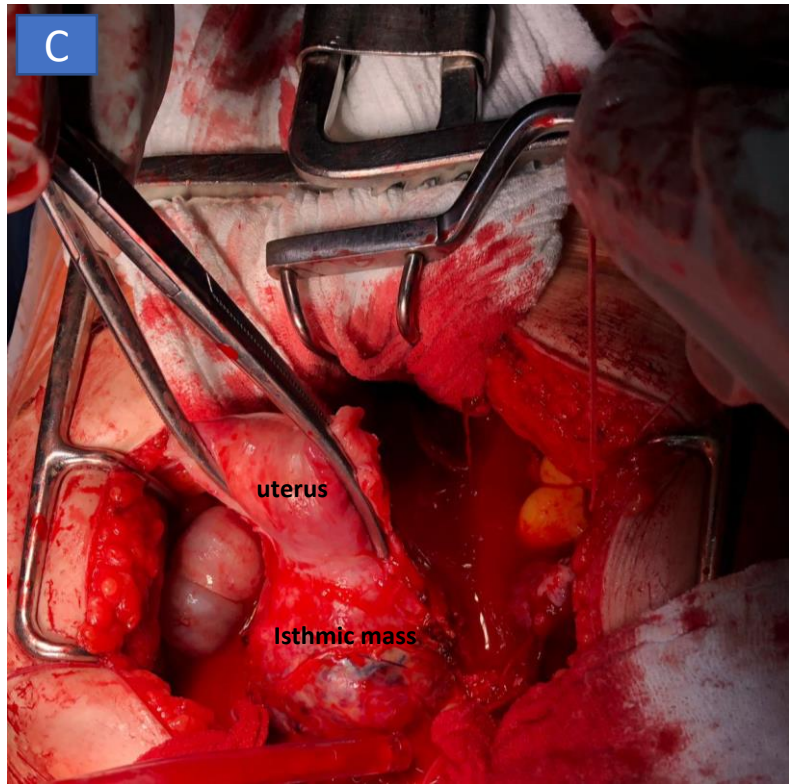

Supplement: MOESM2 [file 18479312]
